# Supplementary material for: Epileptic seizures triggered by eating in dogs
Source: PubMed Central journal article supplement (PMC7255664; doi:10.1111/jvim.15773), 2020-04-28
Supplement: JVIM-34-1231-s002.pdf [file JVIM-34-1231-s002.pdf]

**Supplemental Table 1.** Table summarizing breed, gender, presence or absence of spontaneous recurrent seizures (SRS), age at onset of seizures triggered by eating (STE) and SRS, a description of the seizure, presence and duration of postictal signs, seizure semiology, diagnosis, pharmacological treatment and eating habits that reduced STE frequency.

| Case number | Breed                              | Gender | ES alone or ES and SS        | Age at onset of ES/SS (months) | Seizure description based on questionnaire and video footage                                                                                                                                                                                                                                                        | Post-ictal signs and duration                                           | Seizures semiology                              | Diagnosis           | Pharmacological treatment attempted                                      | Eating habits changed that resulted in reduced ES frequency |
|-------------|------------------------------------|--------|------------------------------|--------------------------------|---------------------------------------------------------------------------------------------------------------------------------------------------------------------------------------------------------------------------------------------------------------------------------------------------------------------|-------------------------------------------------------------------------|-------------------------------------------------|---------------------|--------------------------------------------------------------------------|-------------------------------------------------------------|
| 1           | Golden Retriever                   | ME     | ES and SS                    | 36/42                          | Contorts head to one side, opens mouth and keeps it open for several seconds, lifts legs before falling to lateral recumbence and then becoming a GTCS.                                                                                                                                                             | Y/up to 20 min                                                          | Partial evolving to GTCS                        | IE                  | Phenobarbitone                                                           | Preparing food away/reducing excitement                     |
| 2           | Curly Coated Retriever             | ME     | Eating and drinking seizures | 14                             | Has difficulty ambulating forward, facial twitching, sometimes walks backwards, lifts a thoracic limb (mainly left in video footage) intermittently, gets mildly kyphotic, looks scared, confused, has small jerks and generalised tremors, only turns left in video footage. Does not fall into lateral recumbence | Y/up to 120 min                                                         | Partial evolving to generalised                 | IE                  | Phenobarbitone                                                           | N/A                                                         |
| 3           | Bichon Frise                       | FN     | ES and SS                    | 36/36                          | Facial or leg twitching before becoming a GTCS. After starting treatment seizures became myoclonic                                                                                                                                                                                                                  | Y/for 10 min after GTCS but is normal straight after myoclonic seizures | Partial evolving to GTCS and myoclonic seizures | IE                  | Phenobarbitone<br>Levetiracetam                                          | N/A                                                         |
| 4           | Jack Russell Terrier               | FN     | ES                           | 36                             | Facial or leg twitching and lifting a thoracic limb before becoming a GTCS.                                                                                                                                                                                                                                         | Y/up to 120 min                                                         | Partial seizures evolving to GTCS               | IE                  | N/A                                                                      | N/A                                                         |
| 5           | Flat Coated Retriever              | ME     | ES and SS                    | 15/15                          | Facial twitching, lifting and twitching of a thoracic limb, falling to lateral recumbence and becoming GTCS but not always losing consciousness. Sometimes wants to keep eating                                                                                                                                     | Y/normally 30 min but lasting up to 120 min                             | Partial seizures sometimes evolving to GTCS     | IE                  | Phenobarbitone<br>Levetiracetam<br>Potassium bromide                     | N/A                                                         |
| 6           | Poodle                             | FN     | ES and SS                    | 12/12                          | Vigorous head shaking, facial or leg twitching that quickly progresses to GTCS                                                                                                                                                                                                                                      | Y/usually for 10 min                                                    | Partial seizures evolving to GTCS               | IE                  | Phenobarbitone<br>Levetiracetam<br>Potassium bromide<br>Imepitoin        | N/A                                                         |
| 7           | English Staffordshire Bull Terrier | MN     | ES and SS                    | 24/24                          | Mouth chattering, turns head, and becomes GTCS                                                                                                                                                                                                                                                                      | Y/unknown length of time                                                | Partial seizures evolving to GTCS               | IE                  | Phenobarbitone<br>Levetiracetam<br>Imepitoin<br>Alprazolam<br>Gabapentin | Hand feeding                                                |
| 8           | Golden Retriever                   | FE     | ES                           | 27                             | Facial twitching and opening mouth and progresses to GTCS                                                                                                                                                                                                                                                           | Y/up to 120 min                                                         | Partial seizures evolving to GTCS               | IE                  | Levetiracetam                                                            | N/A                                                         |
| 9           | Border Collie                      | FN     | ES and SS                    | 69/30                          | Chattering, opens mouths and falls to lateral recumbence, sometimes evolving to GTCS                                                                                                                                                                                                                                | Y/15-20min                                                              | Partial seizures sometimes evolving to GTCS     | IE                  | Phenobarbitone<br>Levetiracetam<br>Potassium bromide<br>Imepitoin        | Providing liquidised food                                   |
| 10          | Border Terrier                     | FN     | ES                           | 120                            | Facial twitching and myoclonic jerks evolving to GTCS                                                                                                                                                                                                                                                               | N                                                                       | Partial seizures evolving to GTCS               | Structural epilepsy | Levetiracetam<br>Prednisolone                                            | N/A                                                         |

ES: eating seizures; SS: spontaneous seizures; IE: idiopathic epilepsy; Y: Yes; N: No; GTCS: generalised tonic-clonic seizure; Min: minutes; FN: female neutered; FE: female entire; MN: male neutered; ME: male entire, N/A: not applicable
